# Supplementary material
Source: HighWire-hosted journal article supplement (https://erj.ersjournals.com/content/57/2/2003132)
Supplement: inline-supplementary-material-1 [file inline-supplementary-material-1.pdf]

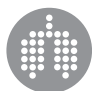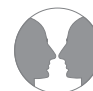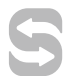

SHAREABLE PDF

# Reversible pulmonary hypertension associated with multivisceral Whipple's disease

Alice Camboulive<sup>1,2,3,9</sup>, Etienne-Marie Jutant<sup>1,2,3,9</sup>, Laurent Savale <sup>1,2,3</sup>, Xavier Jaïs<sup>1,2,3</sup>, Olivier Sitbon <sup>1,2,3</sup>, Charlotte Mussini<sup>4,5</sup>, Jérémie Bénichou<sup>5,6</sup>, Jean-Christophe Lagier<sup>7,8</sup>, Marc Humbert <sup>1,2,3</sup> and David Montani <sup>1,2,3</sup>

**Affiliations:** <sup>1</sup>Assistance Publique - Hôpitaux de Paris (AP-HP), Dept of Respiratory and Intensive Care Medicine, Pulmonary Hypertension National Referral Center, Hôpital Bicêtre, Le Kremlin-Bicêtre, France. <sup>2</sup>Université Paris-Saclay, School of Medicine, Le Kremlin-Bicêtre, France. <sup>3</sup>INSERM UMR\_S 999 "Pulmonary Hypertension: Pathophysiology and Novel Therapies", Hôpital Marie Lannelongue, Le Plessis-Robinson, France. <sup>4</sup>AP-HP, Service d'Anatomie et de Cytologie Pathologiques, Hôpital de Bicêtre, Le Kremlin-Bicêtre, France. <sup>5</sup>Hôpitaux Universitaires Paris-Saclay, Le Kremlin-Bicêtre, France. <sup>6</sup>AP-HP, Service d'ophtalmologie, Hôpital de Bicêtre, Le Kremlin-Bicêtre, France. <sup>7</sup>Aix Marseille University, IRD, AP-HM, MEPHI, Marseille, France. <sup>8</sup>IHU-Méditerranée Infection, Marseille, France. <sup>9</sup>Contributed equally.

**Correspondence:** David Montani, Service de Pneumologie, Hôpital Bicêtre, 78, Rue du général Leclerc, 94270 Le Kremlin-Bicêtre, France. E-mail: david.montani@daphp.fr

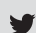

@ERSpublications

**A report of multivisceral Whipple's disease with severe precapillary pulmonary hypertension cured by doxycycline and hydroxychloroquine therapy associated with initial oral combination of bosentan and tadalafil.** <https://bit.ly/2SECU3L>

**Cite this article as:** Camboulive A, Jutant E-M, Savale L, *et al.* Reversible pulmonary hypertension associated with multivisceral Whipple's disease. *Eur Respir J* 2021; 57: 2003132 [<https://doi.org/10.1183/13993003.03132-2020>].

This single-page version can be shared freely online.

## To the Editor:

Whipple's disease (WD) is a rare infectious disease developed through fecal–oral transmission and caused by *Tropheryma whipplei*, a ubiquitous gram bacillus [1]. The pathogenesis remains unclear, and several host factors seem to be implicated, including male sex, comorbidities and genetic susceptibility [1]. WD is a multivisceral disorder with frequent gastro-intestinal, joint and neurological involvement, as well as pulmonary, cardiovascular, mucocutaneous and ophthalmologic lesions [2]. The diagnosis is made *via* small bowel biopsy with periodic acid Schiff staining (PAS) positivity and by PCR on different biological samples [1]. Classical treatment requires prolonged antibiotic therapy and allows rapid improvement. Combination therapy with doxycycline and hydroxychloroquine over 1 year followed by lifetime treatment with doxycycline has been shown to lead to good clinical responses and fewer relapses [3]. Others have recommended initial use of intravenous antibiotics, followed by trimethoprim–sulfamethoxazole for 1 year [4]. Among lung complications of WD, pulmonary hypertension (PH) is very rare and remains poorly understood [5–8]. Here, we report the first well-documented case of a man with concomitant diagnosis of severe precapillary PH and multivisceral WD who had total reversibility in haemodynamics and clinical state after treatment of WD and PH.
